# Supplementary material
Source: Springer Nature journal article supplement (https://www.springermedizin.de/resource/supplementary/13256_2013_2730_MOESM2_ESM.pdf/9651316)

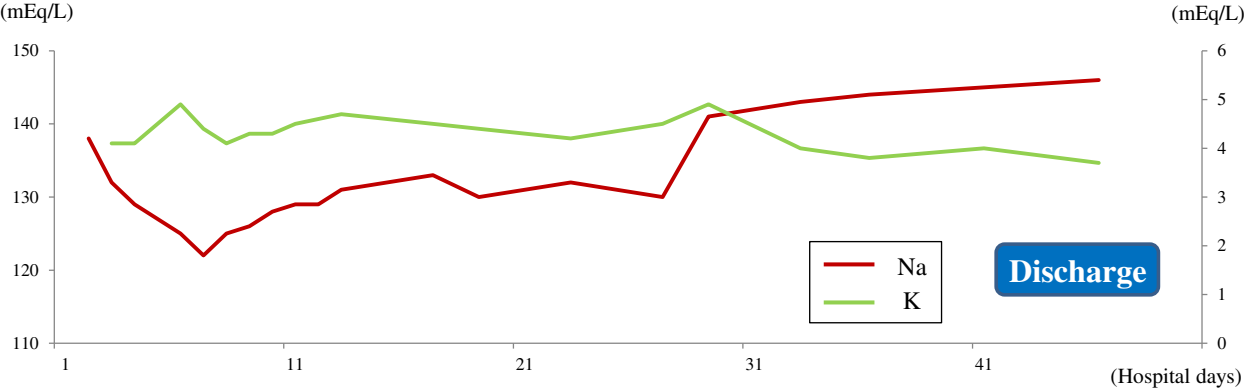

**Treatment**

Fluid restriction : 1000 ml/day

Hydrocortisone 20-30 mg/day

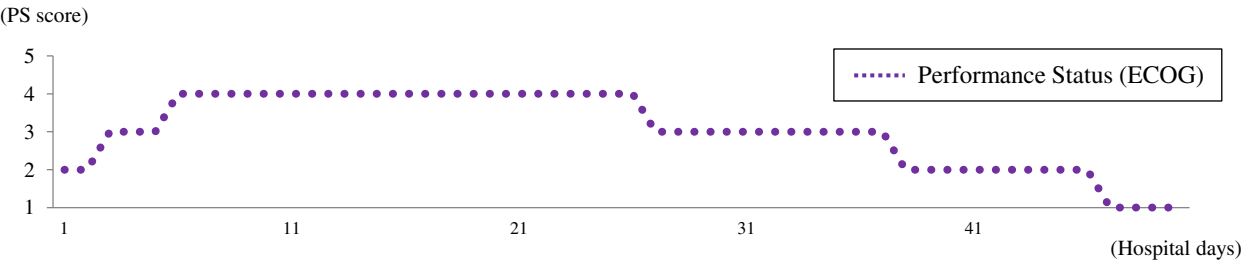

Supplement: MOESM2 [file 9651316]
